# Supplementary material for: High ionic conductivity of a flexible solid-state composite electrolyte for a lithium-ion battery
Source: Royal Society of Chemistry journal article supplement (doi:10.1039/d3ta07975a), 2024-01-01
Supplement: d3ta07975a4.pdf [file d3ta07975a4.pdf]

## **Supporting Information**

### **High Ionic Conductivity of Flexible Solid-State Composite Electrolyte for**

### **Lithium-Ion Battery**

Authors: Yu-Huei Song, Yu-Ching Chen, En-Ci Lin, Tzu Yun Liang, Che Ya Wu, Ai-Yin Wang, Han-Yi Chen, and Jyh Ming Wu\*

Department of Materials Science and Engineering, National Tsing Hua University,  
101, Section 2 Kuang Fu Road, Hsinchu 300, Taiwan.

\*: Corresponding Author: J. M. Wu, email: [jmwuyun@gapp.nthu.edu.tw](mailto:jmwuyun@gapp.nthu.edu.tw)

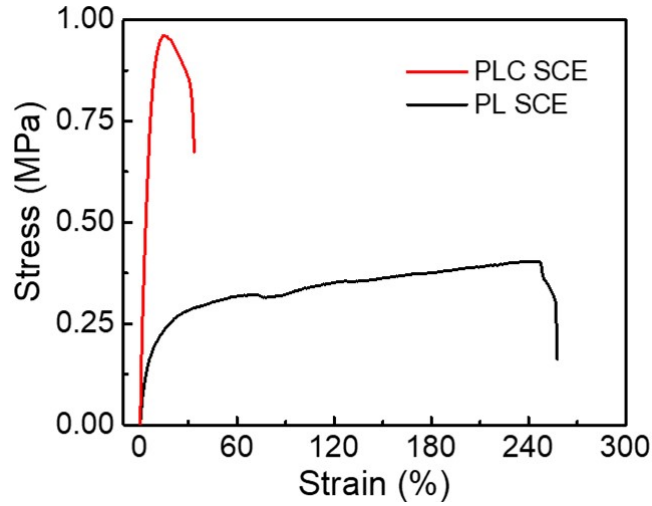

Figure S1. The stress-strain curves of PLC SCE and PL SCE.

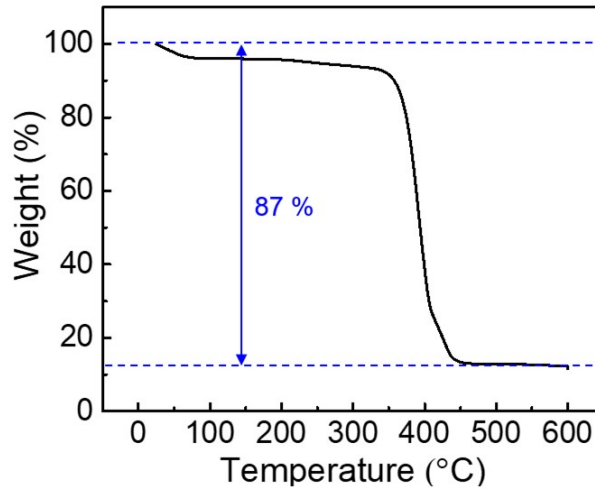

Figure S2. TGA curves of PLC SCE.

### Video #1

Molecular dynamics simulations: Ion diffusion behavior was investigated using the mean square displacement of Li-ion movement in an electrolyte incorporating CNF-A, CNF-B, and CNF-C spanning the time range from 0 ps to 1500 ps.

### Video #2

Conduct fire resistance tests of PL SCE and PLC SCE to observe their flammability.

### Video #3

Failure risk of the battery cell tests: Utilizing PLC SCE as the electrolyte to evaluate the battery underwent folding, nail penetration, and cutting.

Table S1

| Sample  | $t_{Li^+}$ | Initial Current ( $i_0$ ) | Steady-State Current ( $i_s$ ) | Applied Potential ( $\Delta V$ ) | Initial Resistance ( $R_0$ ) | Steady-State Resistance ( $R_s$ ) |
|---------|------------|---------------------------|--------------------------------|----------------------------------|------------------------------|-----------------------------------|
| PLC SCE | 0.47       | 0.15 A                    | 0.07 A                         | 10 mV                            | 100 $\Omega$                 | 150 $\Omega$                      |
